# Supplementary material for: RANTES/CCL5 mediated-biological effects depend on the syndecan-4/PKCα signaling pathway
Source: PubMed Central journal article supplement (PMC4197448; doi:10.1242/bio.20148227), 2014-09-26
Supplement: supp_bio.20148227_bio.20148227-s1.pdf [file supp_bio.20148227_bio.20148227-s1.pdf]

**Supplementary Material**

Loïc Maillard et al. doi: 10.1242/bio.20148227

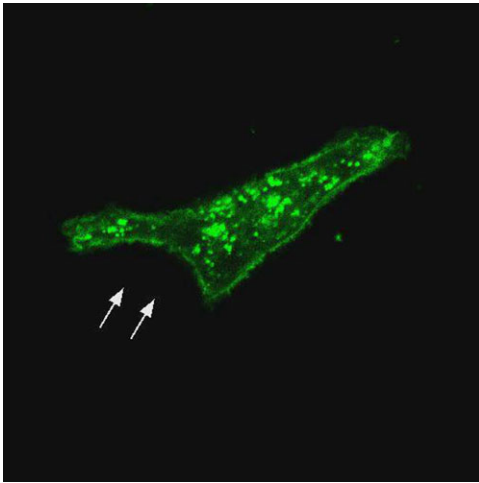

**Movie 1. Morphology of SDC4WT-transfected HUV-EC-C.** The morphology of SDC4WT-transfected HUV-EC-C was analyzed by live confocal microscopy upon RANTES/CCL5 stimulation for 15 minutes. Membrane protrusions were shown by white arrows. ( $\times 400$ ).

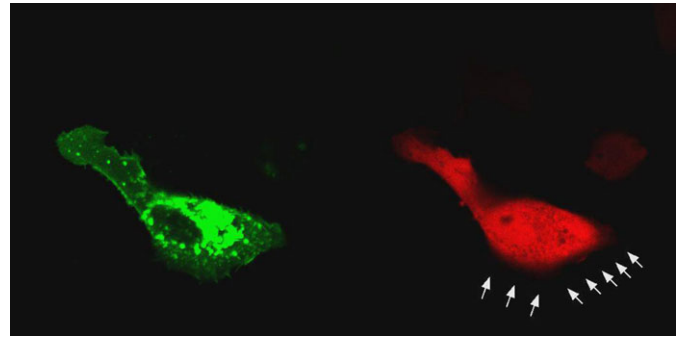

**Movie 3. PKC $\alpha$  translocation of S179A and PKC $\alpha$ -co-transfected HUV-EC-C.** The PKC $\alpha$  translocation of PKC $\alpha$ -DsRed2 and GFP-S179A-SDC4 co-transfected HUV-EC-C was analyzed by live confocal microscopy upon RANTES/CCL5 stimulation for 15 minutes. Membrane localization of PKC $\alpha$  (red) was indicated with white arrows. ( $\times 400$ ).

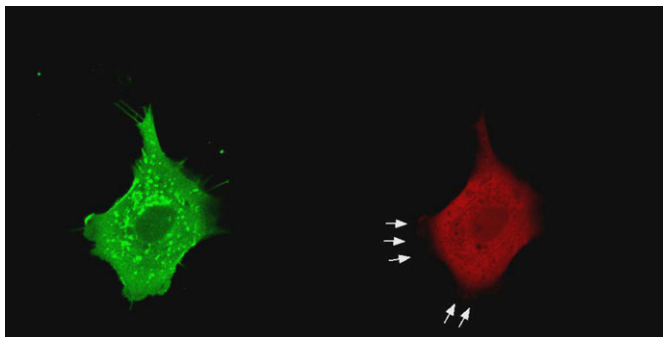

**Movie 2. PKC $\alpha$  translocation of SDC4WT and PKC $\alpha$ -co-transfected HUV-EC-C.** The PKC $\alpha$  translocation of PKC $\alpha$ -DsRed2 and GFP-SDC4WT co-transfected HUV-EC-C was analyzed by live confocal microscopy upon RANTES/CCL5 stimulation for 15 minutes. Membrane localization of PKC $\alpha$  (red) was indicated with white arrows. ( $\times 400$ ).

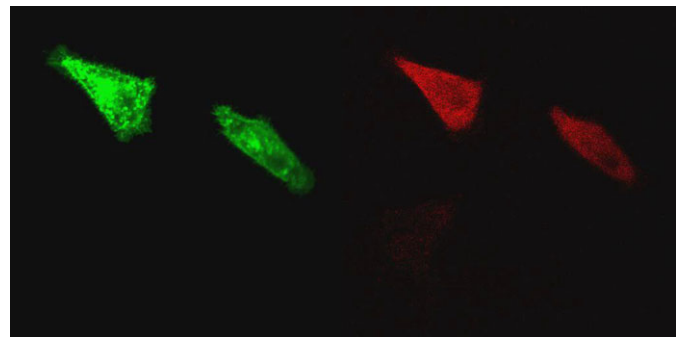

**Movie 4. PKC $\alpha$  translocation of L188QQ and PKC $\alpha$ -co-transfected HUV-EC-C.** The PKC $\alpha$  translocation of PKC $\alpha$ -DsRed2 and GFP-L188QQ-SDC4 co-transfected HUV-EC-C was analyzed by live confocal microscopy upon RANTES/CCL5 stimulation for 15 minutes. ( $\times 400$ ).
